# Supplementary figures and images for: Preparation, crystal structures and spectroscopic properties of vanadium(iii) complexes with [V–O–V]4+ cores
Source: Royal Society of Chemistry journal article supplement (doi:10.1039/b106517n), 2002-01-01

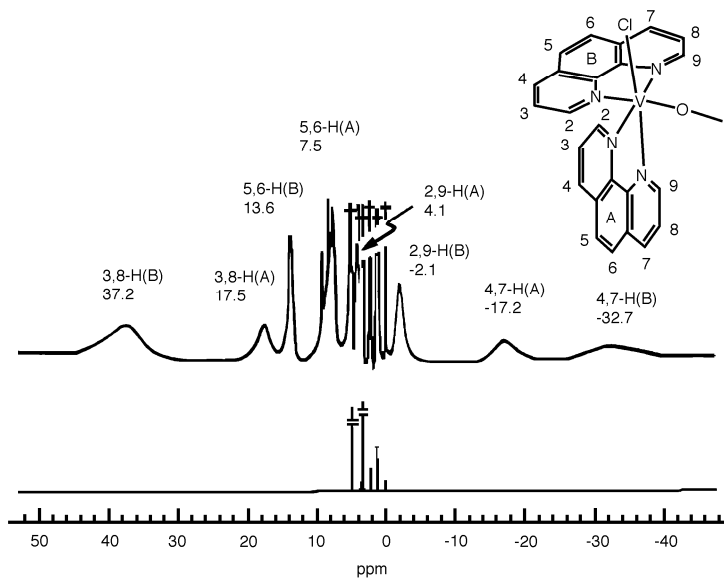

Supplement: b106517n.pdf [file b106517n.pdf]
